# Supplementary material for: High Mortality in an Older Japanese Population with Low Forced Vital Capacity and Gender-Dependent Potential Impact of Muscle Strength: Longitudinal Cohort Study
Source: MDPI journal article supplement (doi:10.3390/jcm11185264), 2022-09-06
Supplement: s1 [file s1]

**Supplementary Table S1: Association between FVC% predicted and mortality (Exclusion of deaths occurring in the first 3 years of follow-up) \*.**

| <b>Males (410)</b>   |            |                  |                  |                  |         |
|----------------------|------------|------------------|------------------|------------------|---------|
|                      | Q1**       | Q2††             | Q3‡‡             | Q4§§             | P-trend |
| Number of cases      | 103        | 103              | 105              | 99               |         |
| Number of death      | 29         | 35               | 34               | 46               |         |
| Model 1†             | 1.0 (ref.) | 1.33 (0.81–2.18) | 1.19 (0.72–1.95) | 1.99 (1.25–3.16) | 0.010   |
| Model 2†             | 1.0 (ref.) | 1.33 (0.81–2.17) | 1.19 (0.72–1.95) | 1.94 (1.22–3.10) | 0.012   |
| Model 3§             | 1.0 (ref.) | 1.55 (0.93–2.60) | 1.25 (0.74–2.14) | 2.10 (1.27–3.47) | 0.014   |
| <b>Females (560)</b> |            |                  |                  |                  |         |
|                      | Q1 **      | Q2††             | Q3‡‡             | Q4§§             | P-trend |
| Number of cases      | 141        | 141              | 139              | 139              |         |
| Number of death      | 22         | 31               | 20               | 30               |         |
| Model 1†             | 1.0 (ref.) | 1.55 (0.90–2.67) | 0.95 (0.52–1.75) | 1.42 (0.82–2.47) | 0.520   |
| Model 2†             | 1.0 (ref.) | 1.71 (0.99–2.97) | 1.08 (0.59–1.99) | 1.48 (0.86–2.58) | 0.418   |
| Model 3§             | 1.0 (ref.) | 1.75 (0.98–3.11) | 1.04 (0.54–1.99) | 1.48 (0.82–2.70) | 0.494   |

FVC% predicted = % predicted value forced vital capacity; BMI = body mass index; hs-CRP = high sensitive C-reactive protein; ref = reference. \* Hazard ratio (95% confidence interval). † Model 1: univariate model. ‡ Model 2: adjusted for age. § Model 3: adjusted for Model 2 + medical history (pneumonia, bronchial asthma, cancer, stroke, myocardial infarction, diabetes, hypertension), smoking, alcohol consumption, depressive symptoms, cognitive function, educational level, marital status, leg extension power, BMI, albumin and hs-CRP. \*\* Q1; FVC% predicted  $\geq 100.5$  (male),  $\geq 114.5$  (female). †† Q2; FVC% predicted  $\geq 89.2$  to  $< 100.5$  (male),  $\geq 100.9$  to  $< 114.5$  (female). ‡‡ Q3; FVC% predicted  $\geq 78.3$  to  $< 89.2$  (male),  $\geq 87.7$  to  $< 100.9$  (female). §§ Q4; FVC% predicted  $< 78.3$  (male),  $< 87.7$  (female).

**Supplementary Table S2: Association between FVC% predicted (2 groups  $< 80\%$  and  $\geq 80\%$ ) and mortality \*.**

|                 | <b>Males (420)</b> |                  |       | <b>Females (565)</b> |                  |       |
|-----------------|--------------------|------------------|-------|----------------------|------------------|-------|
|                 | %FVC               | %FVC             | P     | %FVC                 | %FVC             | P     |
|                 | $\geq 80\%$        | $< 80\%$         |       | $\geq 80\%$          | $< 80\%$         |       |
| Number of cases | 296                | 124              |       | 484                  | 81               |       |
| Number of death | 97                 | 57               |       | 85                   | 23               |       |
| Model 1†        | 1.0 (ref.)         | 1.60 (1.15–2.22) | 0.005 | 1.0 (ref.)           | 1.67 (1.05–2.64) | 0.030 |
| Model 2‡        | 1.0 (ref.)         | 1.57 (1.13–2.18) | 0.007 | 1.0 (ref.)           | 1.63 (1.03–2.58) | 0.038 |
| Model 3§        | 1.0 (ref.)         | 1.58 (1.11–2.24) | 0.010 | 1.0 (ref.)           | 1.87 (1.11–3.14) | 0.019 |

FVC% predicted = % predicted value forced vital capacity; BMI = body mass index; hs-CRP = high sensitive C-reactive protein; ref = reference. \* Hazard ratio (95% confidence interval). † Model 1: univariate model. ‡ Model 2: adjusted for age. § Model 3: Model 2 adjusted for medical history (pneumonia, bronchial asthma, cancer, stroke, myocardial infarction, diabetes, hypertension), smoking, alcohol consumption, depressive symptoms, cognitive function, educational level, marital status, leg extension power, BMI, albumin and hs-CRP.

**Supplementary Table S3: The effect of muscle strength (2 groups) \* on the association between FVC% predicted (2 groups  $< 80\%$  and  $\geq 80\%$ ) and mortality †.**

|                  | <b>Males (420)</b>         |                         |       | <b>Females (565)</b>       |                         |       |
|------------------|----------------------------|-------------------------|-------|----------------------------|-------------------------|-------|
|                  | FVC% predicted $\geq 80\%$ | FVC% predicted $< 80\%$ | P     | FVC% predicted $\geq 80\%$ | FVC% predicted $< 80\%$ | P     |
| <b>Model 1 ‡</b> |                            |                         |       |                            |                         |       |
| FVC% predicted   |                            |                         |       |                            |                         |       |
| Leg power        | 1.0 (ref.)                 | 1.60 (1.15–2.22)        | 0.005 | 1.0 (ref.)                 | 1.67 (1.05–2.64)        | 0.030 |
| <b>Model 2 §</b> |                            |                         |       |                            |                         |       |
| FVC% predicted   |                            |                         |       |                            |                         |       |
| Leg power        | 1.0 (ref.)                 | 1.48 (1.06–2.06)        | 0.021 | 1.0 (ref.)                 | 1.67 (1.05–2.67)        | 0.030 |
| <b>Model 3 ¶</b> |                            |                         |       |                            |                         |       |
| FVC% predicted   |                            |                         |       |                            |                         |       |
| Leg power        | 1.0 (ref.)                 | 1.59 (1.12–2.25)        | 0.009 | 1.0 (ref.)                 | 1.81 (1.08–3.02)        | 0.025 |
|                  |                            | 1.70 (1.07–2.68)        | 0.023 |                            | 1.05 (0.61–1.79)        | 0.861 |

FVC% predicted = %forced vital capacity; BMI = body mass index; hs-CRP = high sensitive C-reactive protein; ref = reference. \* Leg extension power  $\geq 15.8$  w/kg (male),  $\geq 9.9$  w/kg (female) and leg extension power  $< 15.8$  w/kg (male),  $< 9.9$  w/kg (female). † Hazard ratio (95% confidence interval). ‡ Model 1: univariate model. § Model 2: Model 1+ leg extension power. ¶ Model 3: Model 2 adjusted for age, medical history (pneumonia, bronchial asthma, cancer, stroke, myocardial infarction, diabetes, hypertension), smoking, alcohol consumption, depressive symptoms, cognitive function, educational level, marital status, BMI, albumin and hs-CRP.
